# Supplementary material for: Adaptation of metabolite leakiness leads to symbiotic chemical exchange and to a resilient microbial ecosystem
Source: PubMed Central journal article supplement (PMC8260005; doi:10.1371/journal.pcbi.1009143), 2021-06-23

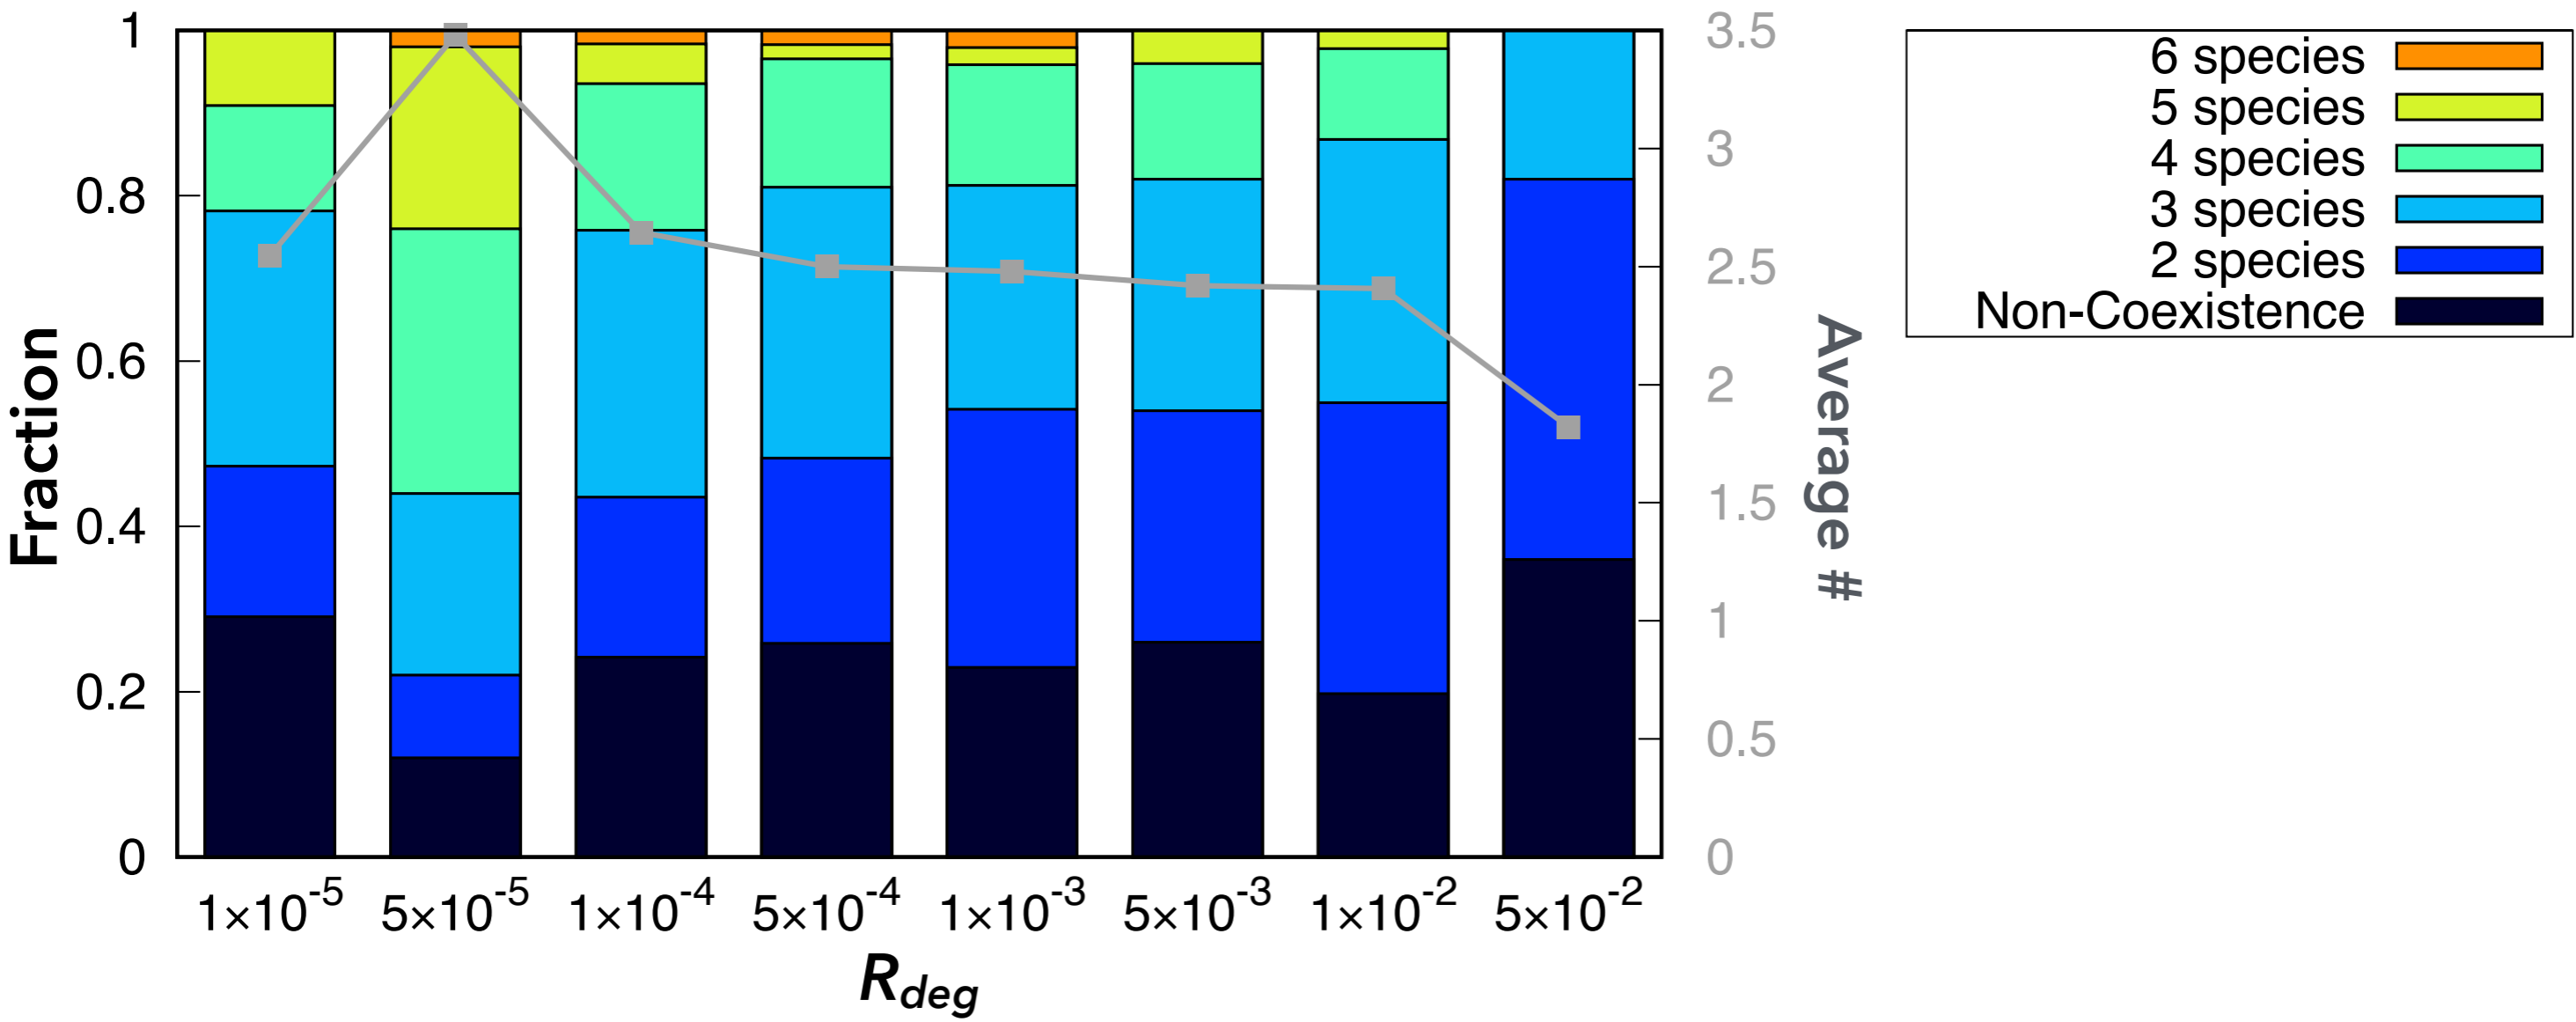

Supplement: pcbi.1009143.s004.pdf [file pcbi.1009143.s004.pdf]
